# Supplementary material for: Integrating biological HLA-DPB1 mismatch models to predict survival after unrelated hematopoietic cell transplantation
Source: PubMed Central journal article supplement — Haematologica. 2022 May 12;108(2):645–52. doi: 10.3324/haematol.2021.280055 (PMC9890035; doi:10.3324/haematol.2021.280055), 2022-05-12

# Integrating biological HLA-DPB1 mismatch models to predict survival after unrelated hematopoietic cell transplantation

Annalisa Ruggeri,<sup>1,2</sup> Liesbeth C. de Wreede,<sup>3</sup> Carlheinz R. Müller,<sup>4</sup> Pietro Crivello,<sup>5</sup> Edouard F. Bonneville,<sup>3</sup> Effie W. Petersdorf,<sup>6</sup> Gerard Socié,<sup>7</sup> Valérie Dubois,<sup>8</sup> Riitta Niittyvuopio,<sup>9</sup> Juha Peräsaari,<sup>10</sup> Ibrahim Yakoub-Agha,<sup>11</sup> Jan J. Cornelissen,<sup>12</sup> Lotte Wieten,<sup>13</sup> Tobias Gedde-Dahl,<sup>14</sup> Edouard Forcade,<sup>15</sup> Charles R. Crawley,<sup>16</sup> Steven G.E. Marsh,<sup>17</sup> Virginie Gandemer,<sup>18</sup> Eleni Tholouli,<sup>19</sup> Claude-Eric Bulabois,<sup>20</sup> Anne Huynh,<sup>21</sup> Goda Choi,<sup>22</sup> Eric Deconinck,<sup>23</sup> Maija Itäla-Remes,<sup>24</sup> Stig Lenhoff,<sup>25</sup> Mats Bengtsson,<sup>26</sup> Jan-Erik Johansson,<sup>27</sup> Gwendolyn van Gorkom,<sup>28</sup> Jorinde D. Hoogenboom,<sup>29</sup> Luca Vago,<sup>1,2</sup> Vanderson Rocha,<sup>30</sup> Chiara Bonini,<sup>1,2</sup> Christian Chabannon<sup>2,31</sup> and Katharina Fleischhauer<sup>2,5,32</sup>

*An appendix with all contributing EBMT centers can be found at the end of the manuscript.*

<sup>1</sup>San Raffaele Scientific Institute, Hematology and Bone Marrow Transplantation unit, Milan, Italy; <sup>2</sup>Cellular Therapy and Immunobiology Working Party of the EBMT, Leiden, the Netherlands; <sup>3</sup>Leiden University Medical Center, Leiden, the Netherlands; <sup>4</sup>Zentrales Knochenmarkspender-Register Deutschland, Ulm, Germany; <sup>5</sup>Institute for Experimental Cellular Therapy, University Hospital Essen, Essen, Germany; <sup>6</sup>Fred Hutchinson Cancer Research Center, Seattle, WA, USA; <sup>7</sup>Hôpital St. Louis, Paris, France; <sup>8</sup>Histocompatibility Laboratory, EFS Lyon, Lyon, France; <sup>9</sup>HUCH Comprehensive Cancer Center, Helsinki, Finland; <sup>10</sup>Clinical Laboratory Services, Histocompatibility Testing, Finnish Red Cross Blood Service, Helsinki, Finland; <sup>11</sup>CHU de Lille, Lille, France; <sup>12</sup>Erasmus MC Cancer Institute, Rotterdam, the Netherlands; <sup>13</sup>Transplantation Immunology, Maastricht University Medical Center, Maastricht, the Netherlands; <sup>14</sup>Oslo University Hospital, Rikshospitalet, Oslo, Norway; <sup>15</sup>CHU Bordeaux, Pessac, France; <sup>16</sup>Addenbrookes Hospital, Cambridge, UK; <sup>17</sup>Anthony Nolan Research Institute and UCL Cancer Institute, Royal Free Campus, London, UK; <sup>18</sup>Centre Hospitalier Universitaire de Rennes, Rennes, France; <sup>19</sup>Manchester Royal Infirmary, Manchester, UK; <sup>20</sup>CHU Grenoble Alpes - Université Grenoble Alpes, Grenoble, France; <sup>21</sup>CHU - Institut Universitaire du Cancer Toulouse, Toulouse, France; <sup>22</sup>University Medical Center Groningen (UMCG), Groningen, the Netherlands; <sup>23</sup>Hopital Jean Minjoz, Besancon, France; <sup>24</sup>Turku University Hospital, Turku, Finland; <sup>25</sup>Skanes University Hospital, Lund, Sweden; <sup>26</sup>Department of Immunology, Genetics and Pathology, Uppsala University, Uppsala, Sweden; <sup>27</sup>Sahlgrenska University Hospital, Goeteborg, Sweden; <sup>28</sup>University Hospital Maastricht, Maastricht, the Netherlands; <sup>29</sup>EBMT Leiden Study Unit, Leiden, the Netherlands; <sup>30</sup>Laboratory of Medical Investigation in Pathogenesis and Targeted Therapy in Onco-Immuno-Hematology (LIM-31) of the Service of Hematology and Cell Therapy, Hospital das Clínicas da Faculdade de Medicina da USP, São Paulo, SP, Brazil; <sup>31</sup>Institut Paoli-Calmettes, Centre de Lutte Contre le Cancer, Centre d'Investigations Cliniques en Biothérapie, Université d'Aix-Marseille, Inserm CBT 1409, Marseille, France and <sup>32</sup>German Cancer Consortium, partner site Essen/Düsseldorf, Germany

Correspondence: K. FLEISCHHAUER - [katharina.fleischhauer@uk-essen.de](mailto:katharina.fleischhauer@uk-essen.de)

<https://doi.org/10.3324/haematol.2021.280055>

Supplementary Data

**Integrating biological HLA-DPB1 mismatch models to predict survival after unrelated HCT**

Annalisa Ruggeri<sup>1,2</sup>, Liesbeth C. de Wreede<sup>3</sup>, Carlheinz R. Müller<sup>4</sup>, Pietro Crivello<sup>5</sup>, Edouard F. Bonneville<sup>3</sup>, Effie W. Petersdorf<sup>6</sup>, Gerard Socié<sup>7</sup>, Valérie Dubois<sup>8</sup>, Riitta Niittyvuopio<sup>9</sup>, Juha Peräsaari<sup>10</sup>, Ibrahim Yakoub-Agha<sup>11</sup>, Jan J. Cornelissen<sup>12</sup>, Lotte Wieten<sup>13</sup>, Tobias Gedde-Dahl<sup>14</sup>, Edouard Forcade<sup>15</sup>, Charles R. Crawley<sup>16</sup>, Steven G.E. Marsh<sup>17</sup>, Virginie Gandemer<sup>18</sup>, Eleni Tholouli<sup>19</sup>, Claude-Eric Bulabois<sup>20</sup>, Anne Huynh<sup>21</sup>, Goda Choi<sup>22</sup>, Eric Deconinck<sup>23</sup>, Maija Itäla-Remes<sup>24</sup>, Stig Lenhoff<sup>25</sup>, Mats Bengtson<sup>26</sup>, Jan-Erik Johansson<sup>27</sup>, Gwendolyn van Gorkom<sup>28</sup>, Jorinde D. Hoogenboom<sup>29</sup>, Luca Vago<sup>1,2</sup>, Vanderson Rocha<sup>30</sup>, Chiara Bonini<sup>1,2</sup>, Christian Chabannon<sup>2,31</sup>, Katharina Fleischhauer<sup>2,5</sup>

1. San Raffaele Scientific Institute, Hematology and Bone marrow Transplantation unit, Milan, Italy
2. Cellular Therapy and Immunobiology Working Party of the EBMT, Leiden, The Netherlands
3. Leiden University Medical Center, Leiden, The Netherlands
4. Zentrales Knochenmarkspender-Register Deutschland, Ulm, Germany
5. Institute for Experimental Cellular Therapy, University Hospital Essen, Essen, Germany
6. Fred Hutchinson Cancer Research Center, Seattle, USA

7. Hôpital St. Louis, Paris, France
8. Histocompatibility Laboratory, EFS Lyon, France
9. HUCH Comprehensive Cancer Center, Helsinki, Finland
10. Clinical Laboratory Services, Histocompatibility Testing, Finnish Red Cross Blood Service, Helsinki, Finland
11. CHU de Lille, Lille, France
12. Erasmus MC Cancer Institute, Rotterdam, The Netherlands
13. Transplantation Immunology, Maastricht University Medical Center, Maastricht, The Netherlands
14. Oslo University Hospital, Rikshospitalet, Oslo, Norway
15. CHU Bordeaux, Pessac, France
16. Addenbrookes Hospital, Cambridge, UK
17. Anthony Nolan Research Institute and UCL Cancer Institute, Royal Free Campus, London,, UK
18. Centre Hospitalier Universitaire de Rennes, Rennes, France
19. Manchester Royal Infirmary, Manchester, UK
20. CHU Grenoble Alpes - Université Grenoble Alpes, Grenoble, France
21. CHU - Institut Universitaire du Cancer Toulouse, Toulouse, France
22. University Medical Center Groningen (UMCG), Groningen, The Netherlands
23. Hopital Jean Minjoz, Besancon, France
24. Turku University Hospital, Turku, Finland
25. Skanes University Hospital, Lund, Sweden

26. Department of Immunology, Genetics and Pathology, Uppsala University,  
Uppsala, Sweden
27. Sahlgrenska University Hospital, Goeteborg, Sweden
28. University Hospital Maastricht, Maastricht, The Netherlands
29. EBMT Leiden Study Unit, Leiden, The Netherlands
30. Laboratory of Medical Investigation in Pathogenesis and Targeted Therapy in  
Onco-Immuno-Hematology (LIM-31) of the Service of Hematology and Cell  
Therapy, Hospital das Clínicas da Faculdade de Medicina da USP, São Paulo,  
SP, Brazil
31. Institut Paoli-Calmettes, Centre de Lutte Contre le Cancer; Centre  
d'Investigations Cliniques en Biothérapie, Université d'Aix-Marseille, Inserm CBT  
1409, Marseille, France

Correspondence:

Prof. Katharina Fleischhauer, MD [katharina.fleischhauer@uk-essen.de](mailto:katharina.fleischhauer@uk-essen.de)

This file includes:

Supplementary Tables S1 and S2

Supplementary Figure Legend

Supplementary Figure S1

**Supplementary Table S1: Association of non-HLA-DPB1 variables with clinical endpoints.**

| Variable <sup>a,b</sup>                    | OS   |                   |                 | RFS  |                   |                 | GRFS |                   |                 | Relapse |                   |                 | NRM  |                   |                 | aGvHD 2-4 |                   |                 |
|--------------------------------------------|------|-------------------|-----------------|------|-------------------|-----------------|------|-------------------|-----------------|---------|-------------------|-----------------|------|-------------------|-----------------|-----------|-------------------|-----------------|
|                                            | HR   | CI                | <i>P</i>        | HR   | CI                | <i>P</i>        | HR   | CI                | <i>P</i>        | HR      | CI                | <i>P</i>        | HR   | CI                | <i>P</i>        | HR        | CI                | <i>P</i>        |
| Patient Age <sup>c</sup>                   | 1.16 | 1.10<br>–<br>1.22 | <b>&lt;.001</b> | 1.11 | 1.07<br>–<br>1.17 | <b>&lt;.001</b> | 1.08 | 1.03<br>–<br>1.12 | <b>&lt;.001</b> | 1.06    | 1.00<br>–<br>1.12 | .06             | 1.24 | 1.15<br>–<br>1.34 | <b>&lt;.001</b> | 0.93      | 0.89<br>–<br>0.98 | <b>.01</b>      |
| Donor Age <sup>c</sup>                     | 1.08 | 1.02<br>–<br>1.14 | <b>.01</b>      | 1.05 | 1.00<br>–<br>1.11 | .07             | 1.08 | 1.03<br>–<br>1.14 | <b>.002</b>     | 0.99    | 0.92<br>–<br>1.06 | .76             | 1.16 | 1.07<br>–<br>1.26 | <b>&lt;.001</b> | 1.12      | 1.05<br>–<br>1.20 | <b>&lt;.001</b> |
| Donor Sex<br>Male vs<br>Female             | 0.98 | 0.87<br>–<br>1.10 | .70             | 0.99 | 0.89<br>–<br>1.11 | .91             | 0.91 | 0.82<br>–<br>1.01 | .08             | 1.06    | 0.92<br>–<br>1.23 | .41             | 0.91 | 0.76<br>–<br>1.08 | .28             | 0.88      | 0.77<br>–<br>1.01 | .08             |
| CMV status<br>others vs<br>neg/neg         | 1.00 | 0.89<br>–<br>1.11 | .94             | 0.99 | 0.89<br>–<br>1.09 | .78             | 1.01 | 0.92<br>–<br>1.12 | .82             | 0.92    | 0.81<br>–<br>1.05 | .23             | 1.09 | 0.92<br>–<br>1.29 | .33             | 0.89      | 0.78<br>–<br>1.01 | .07             |
| Diagnosis:<br>MDS+MPN vs<br>AML+ALL        | 0.94 | 0.82<br>–<br>1.09 | .41             | 0.91 | 0.79<br>–<br>1.04 | .16             | 1.06 | 0.94<br>–<br>1.21 | .34             | 0.63    | 0.52<br>–<br>0.76 | <b>&lt;.001</b> | 1.48 | 1.20<br>–<br>1.82 | <b>&lt;.001</b> | 1.34      | 1.14<br>–<br>1.59 | <b>&lt;.001</b> |
| Diagnosis:<br>others vs<br>AML+ALL         | 0.70 | 0.59<br>–<br>0.81 | <b>&lt;.001</b> | 0.90 | 0.78<br>–<br>1.04 | .15             | 1.02 | 0.90<br>–<br>1.17 | .72             | 0.8     | 0.67<br>–<br>0.96 | <b>.02</b>      | 1.12 | 0.89<br>–<br>1.41 | .35             | 1.12      | 0.94<br>–<br>1.34 | .19             |
| Disease Stage:<br>intermediate vs<br>Early | 1.32 | 1.15<br>–<br>1.51 | <b>&lt;.001</b> | 1.26 | 1.11<br>–<br>1.44 | <b>&lt;.001</b> | 1.19 | 1.04<br>–<br>1.33 | <b>.008</b>     | 1.39    | 1.18<br>–<br>1.65 | <b>&lt;.001</b> | 1.07 | 0.87<br>–<br>1.31 | .53             | 1.01      | 0.86<br>–<br>1.18 | .94             |
| Disease Stage:<br>advanced vs<br>Early     | 1.63 | 1.40<br>–<br>1.89 | <b>&lt;.001</b> | 1.65 | 1.44<br>–<br>1.90 | <b>&lt;.001</b> | 1.38 | 1.21<br>–<br>1.57 | <b>&lt;.001</b> | 2.03    | 1.69<br>–<br>2.44 | <b>&lt;.001</b> | 1.24 | 0.99<br>–<br>1.55 | .06             | 1.10      | 0.92<br>–<br>1.31 | .28             |
| Year of HCT:<br>2012-2017 vs<br>2005-2011  | 0.95 | 0.84<br>–<br>1.08 | .42             | 0.94 | 0.84<br>–<br>1.06 | .30             | 0.99 | 0.88<br>–<br>1.10 | .81             | 1.01    | 0.86<br>–<br>1.18 | .92             | 0.86 | 0.72<br>–<br>1.03 | .11             | 1.14      | 0.97<br>–<br>1.34 | .11             |

|                                   |      |      |                 |      |      |                 |      |      |                 |      |      |             |      |      |                 |      |      |                 |
|-----------------------------------|------|------|-----------------|------|------|-----------------|------|------|-----------------|------|------|-------------|------|------|-----------------|------|------|-----------------|
| Stem Cell Source PBSC vs BM       | 1.08 | 0.91 | .39             | 0.98 | 0.84 | .84             | 1.14 | 0.98 | .08             | 1.0  | 0.81 | .97         | 1.00 | 0.78 | .99             | 1.14 | 0.94 | .18             |
|                                   |      | –    |                 |      | –    |                 |      | –    |                 |      | –    |             |      | –    |                 |      | –    |                 |
|                                   |      | 1.28 |                 |      | 1.15 |                 |      | 1.32 |                 |      | 1.22 |             |      | 1.28 |                 |      | 1.38 |                 |
| Conditioning Reduced vs Standard  | 1.00 | 0.88 | .95             | 1.04 | 0.92 | .56             | 0.92 | 0.82 | .18             | 1.16 | 0.99 | .07         | 0.84 | 0.69 | .09             | 0.72 | 0.62 | <b>&lt;.001</b> |
|                                   |      | –    |                 |      | –    |                 |      | –    |                 |      | –    |             |      | –    |                 |      | –    |                 |
|                                   |      | 1.15 |                 |      | 1.17 |                 |      | 1.04 |                 |      | 1.36 |             |      | 1.03 |                 |      | 0.84 |                 |
| TCD Yes vs No                     | 0.93 | 0.83 | .25             | 1.04 | 0.93 | .52             | 0.75 | 0.67 | <b>&lt;.001</b> | 1.24 | 1.06 | <b>.006</b> | 0.80 | 0.67 | <b>.01</b>      | 0.67 | 0.59 | <b>&lt;.001</b> |
|                                   |      | –    |                 |      | –    |                 |      | –    |                 |      | –    |             |      | –    |                 |      | –    |                 |
|                                   |      | 1.05 |                 |      | 1.16 |                 |      | 0.83 |                 |      | 1.44 |             |      | 0.95 |                 |      | 0.77 |                 |
| Karnofsky <=90 vs >90             | 1.59 | 1.28 | <b>&lt;.001</b> | 1.52 | 1.23 | <b>&lt;.001</b> | 1.39 | 1.11 | <b>.004</b>     | 1.36 | 1.01 | <b>.04</b>  | 1.74 | 1.27 | <b>&lt;.001</b> | 1.16 | 0.85 | .36             |
|                                   |      | –    |                 |      | –    |                 |      | –    |                 |      | –    |             |      | –    |                 |      | –    |                 |
|                                   |      | 1.98 |                 |      | 1.88 |                 |      | 1.73 |                 |      | 1.82 |             |      | 2.38 |                 |      | 1.58 |                 |
| Mismatch HLA-DQB1 Yes vs No       | 0.86 | 0.67 | .27             | 0.94 | 0.74 | .58             | 1.03 | 0.83 | .81             | 0.82 | 0.59 | .22         | 1.12 | 0.80 | .52             | 1.20 | 0.91 | .21             |
|                                   |      | –    |                 |      | –    |                 |      | –    |                 |      | –    |             |      | –    |                 |      | –    |                 |
|                                   |      | 1.12 |                 |      | 1.18 |                 |      | 1.27 |                 |      | 1.13 |             |      | 1.57 |                 |      | 1.58 |                 |
| GvHD regimen CSA/MMF vs CSA/MTX   | 1.13 | 1.00 | <b>.04</b>      | 1.06 | 0.95 | .32             | 1.30 | 1.17 | <b>&lt;.001</b> | 0.83 | 0.71 | <b>.01</b>  | 1.47 | 1.23 | <b>&lt;.001</b> | 1.31 | 1.14 | <b>&lt;.001</b> |
|                                   |      | –    |                 |      | –    |                 |      | –    |                 |      | –    |             |      | –    |                 |      | –    |                 |
|                                   |      | 1.28 |                 |      | 1.19 |                 |      | 1.45 |                 |      | 0.96 |             |      | 1.76 |                 |      | 1.51 |                 |
| GvHD regimen other vs CSA/MTX     | 1.69 | 1.24 | <b>&lt;.001</b> | 1.46 | 1.08 | <b>.01</b>      | 1.44 | 1.06 | <b>.02</b>      | 1.18 | 0.80 | <b>.41</b>  | 1.88 | 1.18 | <b>.008</b>     | 1.38 | 0.92 | .12             |
|                                   |      | –    |                 |      | –    |                 |      | –    |                 |      | –    |             |      | –    |                 |      | –    |                 |
|                                   |      | 2.30 |                 |      | 1.96 |                 |      | 1.94 |                 |      | 1.76 |             |      | 3.01 |                 |      | 2.09 |                 |
| GvHD regimen TAC-based vs CSA/MTX | 1.05 | 0.86 | <b>.64</b>      | 1.05 | 0.88 | .59             | 0.94 | 0.79 | <b>.45</b>      | 0.91 | 0.71 | <b>.42</b>  | 1.30 | 0.98 | <b>.07</b>      | 0.83 | 0.66 | .12             |
|                                   |      | –    |                 |      | –    |                 |      | –    |                 |      | –    |             |      | –    |                 |      | –    |                 |
|                                   |      | 1.28 |                 |      | 1.26 |                 |      | 1.11 |                 |      | 1.15 |             |      | 1.72 |                 |      | 1.05 |                 |

<sup>a</sup>Median follow-up was 36.7 months (interquartile range 19.15 to 64.43). At 5-years, RFS, OS and GRFS were 42% (95% CI 41-44%), 49% (95% CI 47-51%) and 33% (95% CI 31-35%) respectively. The cumulative incidences of relapse, NRM and cGVHD at 5-years were 34% (95% CI 32-36%), 23% (95% CI 21-24%) and 42% (95% CI 41-44%) respectively. The cumulative incidences of aGVHD 2-4 and aGVHD 3-4 at 100 days were 30% (95% CI 29-31%) and 11% (95% CI 10-12%), respectively.

<sup>b</sup>Abbreviations: TCD, T-cell depletion; CMV, cytomegalovirus; BM, bone marrow; PBSC, peripheral blood stem cells; RIC, reduced intensity conditioning; MAC, myeloablative conditioning; Year of transplantation: first period 2005-2011, second period 2012-2017; AL, acute leukemia (myeloid or lymphatic); MDS, myelodysplastic syndrome; MPN, myeloproliferative neoplasm. Disease stage was defined as in the legend to **Table 1** in the main text. Donor and patient age was analyzed as continuous variable by decades.

<sup>c</sup>Patient and donor age was considered as linear variable, with higher age associated with worse outcome.

**Supplementary Table S2. Multivariable associations between HLA-DPB1 mismatching models and HCT outcomes.**

| HLA-DPB1 Status <sup>a</sup>   | RFS <sup>b</sup> |              |            | Relapse <sup>b</sup> |              |                 | aGvHD grade 2-4 <sup>b</sup> |              |                 | NRM <sup>b</sup> |              |                 |
|--------------------------------|------------------|--------------|------------|----------------------|--------------|-----------------|------------------------------|--------------|-----------------|------------------|--------------|-----------------|
|                                | HR               | 95% CI       | <i>P</i>   | HR                   | 95% CI       | <i>P</i>        | HR                           | 95% CI       | <i>P</i>        | HR               | 95% CI       | <i>P</i>        |
| Allele-matched                 | 1                |              |            | 1                    |              |                 | 1                            |              |                 | 1                |              |                 |
| Allele-mismatched <sup>c</sup> | 0.95             | 0.87 to 1.05 | .31        | 0.78                 | 0.69 to 0.88 | <b>&lt;.001</b> | 1.25                         | 1.11 to 1.41 | <b>&lt;.001</b> | 1.26             | 1.07 to 1.47 | <b>.005</b>     |
| TCE-permissive <sup>c</sup>    | 0.94             | 0.85 to 1.03 | .20        | 0.81                 | 0.71 to 0.92 | <b>.001</b>     | 1.18                         | 1.04 to 1.35 | <b>.01</b>      | 1.16             | 0.98 to 1.38 | .09             |
| TCE-nonpermissive <sup>c</sup> | 0.98             | 0.88 to 1.08 | .64        | 0.75                 | 0.65 to 0.86 | <b>&lt;.001</b> | 1.35                         | 1.18 to 1.54 | <b>&lt;.001</b> | 1.38             | 1.16 to 1.65 | <b>&lt;.001</b> |
| Low-expression <sup>d</sup>    | 0.98             | 0.87 to 1.1  | .74        | 0.87                 | 0.75 to 1.01 | .07             | 1.09                         | 0.94 to 1.27 | .27             | 1.16             | 0.96 to 1.41 | .13             |
| High-expression <sup>d</sup>   | 0.91             | 0.81 to 1.03 | .14        | 0.69                 | 0.59 to 0.81 | <b>&lt;.001</b> | 1.3                          | 1.12 to 1.52 | <b>&lt;.001</b> | 1.33             | 1.09 to 1.61 | <b>.005</b>     |
| TPHE <sup>d,e</sup>            | 0.81             | 0.69 to 0.95 | <b>.01</b> | 0.68                 | 0.55 to 0.84 | <b>&lt;.001</b> | 1.5                          | 1.25 to 1.8  | <b>&lt;.001</b> | 1.1              | 0.85 to 1.41 | .47             |
| Other <sup>d,e</sup>           | 0.99             | 0.89 to 1.1  | .84        | 0.82                 | 0.71 to 0.94 | <b>.004</b>     | 1.11                         | 0.96 to 1.27 | .16             | 1.28             | 1.07 to 1.53 | <b>.006</b>     |

<sup>a</sup>No associations were observed for any of the models with the endpoints aGvHD grade 3-4, cGvHD, GRFS and OS. <sup>b</sup>Adjustment was made for non-HLA-DPB1 variables as in *Online Supplementary Table S1*. <sup>c</sup>tested in the overall cohort. <sup>d</sup>tested in the single HLA-DPB1 GvH mismatched cohort. <sup>e</sup>TPHE: TCE-permissive and high-expression single HLA-DPB1 GvH mismatches; Other: Non-TPHE single HLA-DPB1 GvH mismatches.

### **Legend to Supplementary Figure S1.**

Study design and RFS according to combined HLA-DPB1 TCE and Expression mismatches A) Flow chart of patient stratification according to HLA-DPB1 matching status. Shown is the absolute number of patients in each group, followed by (in parenthesis) the respective percentage referred to the entire study cohort. B) 5-year probability of RFS after HCT from donors with a single HLA-DPB1 GvH mismatch that is TCE-permissive and high expression (TPHE; 49%), TCE-permissive and low expression (42%), TCE-nonpermissive and high expression (44%) or TCE-nonpermissive and low expression (42%), or DPB1 allele matched (39%).



# Supplementary Figure S1.

A)

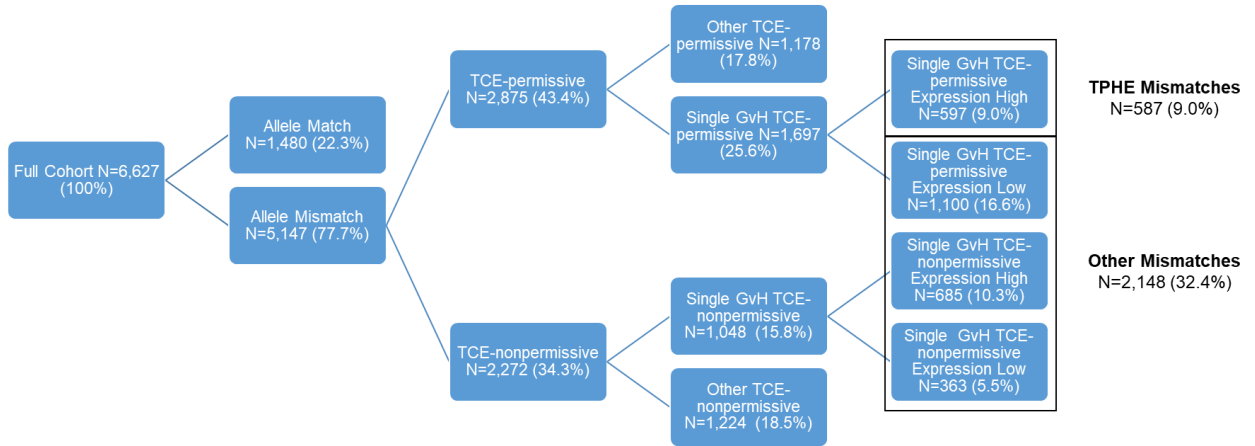

B)

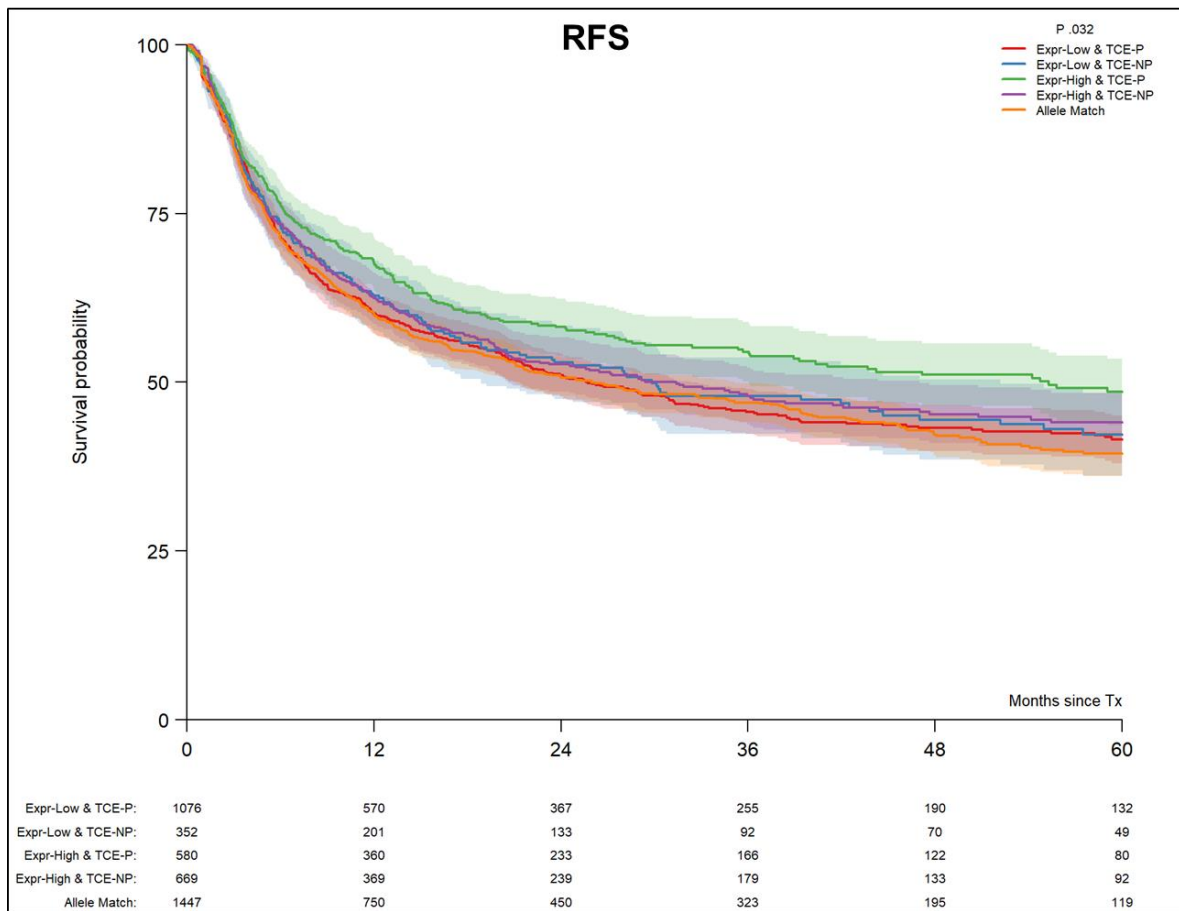

Supplement: 2021_280055_RUGGERI_SUPPL.pdf [file 2021_280055_RUGGERI_SUPPL.pdf]
